# Supplementary material for: Large-Scale Evaluation of Quality of Care in 6 Countries of Eastern Europe and Central Asia Using Clinical Performance and Value Vignettes
Source: PubMed Central journal article supplement (PMC5620338; doi:10.9745/ghsp-d-17-00044), 2017-09-27
Supplement: 17-00044-Peabody-Supplement.pdf [file 17-00044-Peabody-Supplement.pdf]

Peabody JW, DeMaria L, Smith O, Hoth A, Dragoti E, Luck J. Large-scale evaluation of quality of care in 6 countries of Eastern Europe and Central Asia using Clinical Performance and Value vignettes. *Glob Health Sci Pract.* 2017;5(3). <https://doi.org/10.9745/GHSP-D-17-00044>

**SUPPLEMENT.** Scoring Criteria for the Neonatal Pneumonia Clinical Performance and Value Vignette and Results Comparing a High- and Low-Performing Physician

| Physician A<br>(High-Performing) |         |                                                              | Physician B<br>(Low-Performing) |         |
|----------------------------------|---------|--------------------------------------------------------------|---------------------------------|---------|
| Asked                            | Omitted | Scoring Item                                                 | Asked                           | Omitted |
| <b>History</b>                   |         |                                                              |                                 |         |
| X                                |         | Onset and severity of symptoms                               | X                               |         |
| X                                |         | Duration and course of symptoms                              | X                               |         |
| X                                |         | Associated fever, seizures, rash, somnolence, etc.           |                                 | X       |
| X                                |         | Feeding history                                              | X                               |         |
| X                                |         | Hydration status                                             | X                               |         |
|                                  | X       | Gestational age                                              |                                 | X       |
| X                                |         | Gravidity and parity                                         |                                 | X       |
| X                                |         | Recent history of infection or fever in mother               |                                 | X       |
| X                                |         | Labor duration and specifics of delivery                     |                                 | X       |
| X                                |         | Maternal sedation in labor                                   |                                 | X       |
| X                                |         | Hours of ruptured membranes or if there is meconium staining |                                 | X       |
| X                                |         | Need for resuscitation at birth                              |                                 | X       |
|                                  | X       | Apgar scores                                                 |                                 | X       |
|                                  |         | Other maternal medical problems or medications               |                                 | X       |
| <b>Physical Examination</b>      |         |                                                              |                                 |         |
| X                                |         | Vital signs                                                  | X                               |         |
| X                                |         | Oxygenation, skin color                                      | X                               |         |
| X                                |         | Auscultation of lungs                                        | X                               |         |
| X                                |         | Auscultation of heart                                        | X                               |         |
| X                                |         | Capillary refill time                                        |                                 | X       |
|                                  | X       | Palpation/auscultation of the abdomen                        |                                 | X       |
| <b>Workup</b>                    |         |                                                              |                                 |         |
| X                                |         | Complete blood count with differential                       | X                               |         |
| X                                |         | Blood culture                                                | X                               |         |
| X                                |         | Glucose                                                      |                                 | X       |
| X                                |         | Spinal tap                                                   |                                 | X       |
| X                                |         | Chest x-ray                                                  | X                               |         |

Peabody JW, DeMaria L, Smith O, Hoth A, Dragoti E, Luck J. Large-scale evaluation of quality of care in 6 countries of Eastern Europe and Central Asia using Clinical Performance and Value vignettes. *Glob Health Sci Pract.* 2017;5(3). <https://doi.org/10.9745/GHSP-D-17-00044>

| Physician A<br>(High-Performing)              |         |                                                                                             | Physician B<br>(Low-Performing) |         |
|-----------------------------------------------|---------|---------------------------------------------------------------------------------------------|---------------------------------|---------|
| Asked                                         | Omitted | Scoring Item                                                                                | Asked                           | Omitted |
| <b>Diagnosis</b>                              |         |                                                                                             |                                 |         |
| Neonatal sepsis with pneumonia and meningitis |         | Primary diagnosis                                                                           | Pneumonia, community-acquired   |         |
| Moderate-severe                               |         | Severity                                                                                    | Moderate                        |         |
| <b>Treatment</b>                              |         |                                                                                             |                                 |         |
| X                                             |         | Admit to hospital                                                                           | X                               |         |
| X                                             |         | Supplemental oxygen by face mask                                                            |                                 | X       |
| X                                             |         | Intravenous (IV) glucose 10% in 0.18 normal saline                                          |                                 | X       |
| X                                             |         | IV antibiotics: ampicillin+aminoglycoside or IV aminoglycoside+expanded spectrum penicillin | X                               |         |
| X                                             |         | Monitor vital signs                                                                         |                                 | X       |
|                                               | X       | Monitor occipitofrontal circumference                                                       |                                 | X       |
| X                                             |         | Repeat blood cultures after 24–48 hours                                                     |                                 | X       |
| X                                             |         | Repeat lumbar puncture after 24–48 hours of initiating antibiotics                          |                                 | X       |
| <b>Total CPV Score</b>                        |         |                                                                                             |                                 |         |
| <b>31/35=89%</b>                              |         |                                                                                             | <b>14/35=40%</b>                |         |
